# Supplementary material for: Repeated translocation of a gene cassette drives sex-chromosome turnover in strawberries
Source: PubMed Central journal article supplement (PMC6128632; doi:10.1371/journal.pbio.2006062), 2018-08-27

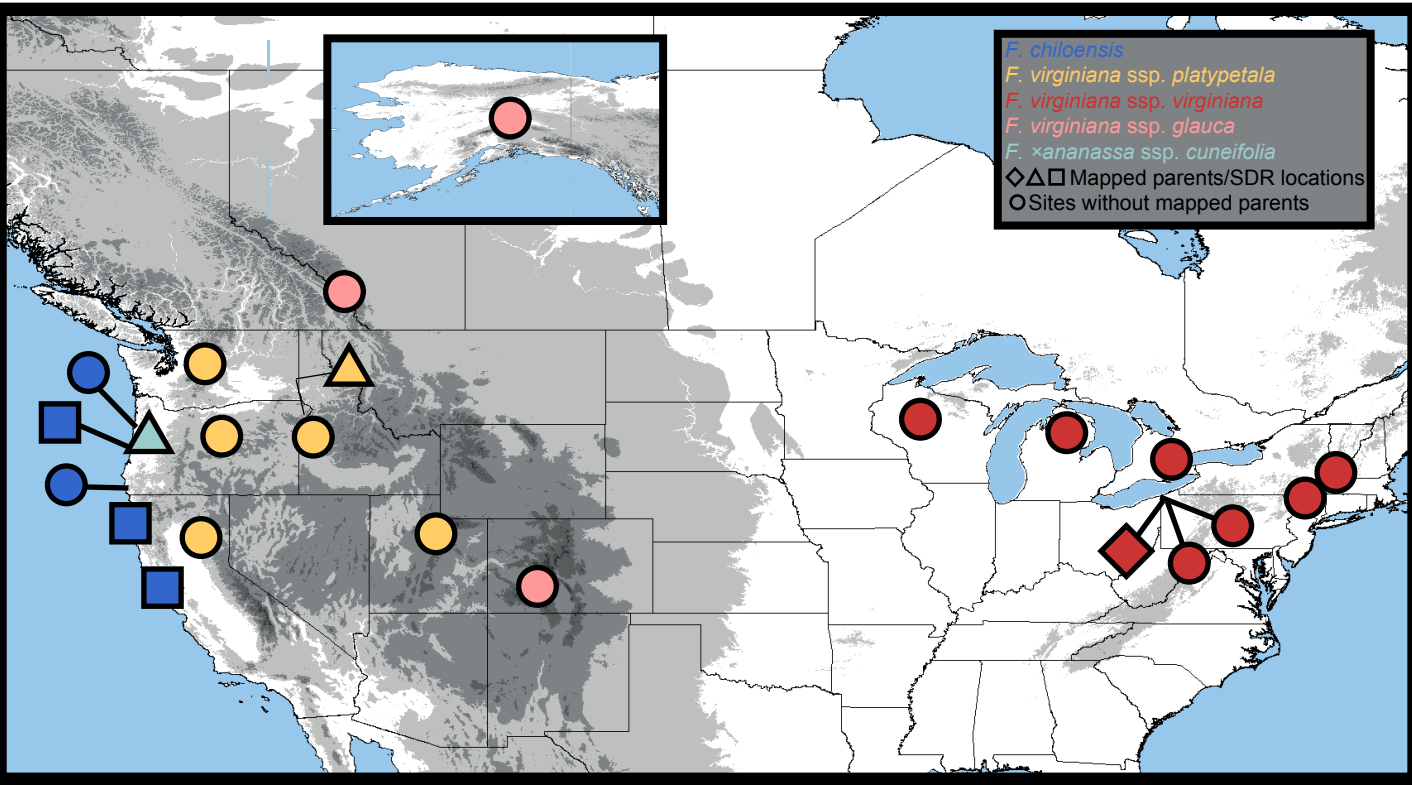

Supplement: pbio.2006062.s002.pdf [file pbio.2006062.s002.pdf]
